# Supplementary material
Source: PubMed Central journal article supplement (PMC2134902)
Supplement: neo0912_1057SD1.pdf [file neo0912_1057SD1.pdf]

**Table W1.** Peptides Identified By MALDI-TOF.

| Peptide | Band (kDa)        |                   | Position |
|---------|-------------------|-------------------|----------|
|         | 47                | 53                |          |
| 1       | TYQGSYGFR         | TYQGSYGFR         | 102–110  |
| 2       | KPLDGEYFTLQIR     | KPLDGEYFTLQIR     | 321–333  |
| 3       | KKPLDGEYFTLQIR    | KKPLDGEYFTLQIR    | 320–333  |
| 4       | TCPVQLWVDSTPPPGTR | TCPVQLWVDSTPPPGTR | 140–156  |
| 5       |                   | ERFEMFR           | 336–342  |
| 6       |                   | QSQHMTEVVR        | 165–174  |
| 7       |                   | VEYLDDRNTFR       | 203–213  |
| 8       |                   | CSDSDGLAPPQHLIR   | 182–196  |

**Table W2.** Genes Induced following Adp53<sup>wt</sup> Infection.

| Probe Set(s)*                                      | Gene Symbol <sup>†</sup> | Induced          |
|----------------------------------------------------|--------------------------|------------------|
| 218559_s_at                                        | <i>MAFB</i>              | 5.8 <sup>‡</sup> |
| 205249_at                                          | <i>EGR2</i>              | 4.7              |
| 224646_x_at, 224997_x_at                           | <i>H19</i>               | 4.5              |
| 1554340_a_at                                       | <i>C1orf187</i>          | 4.0 <sup>§</sup> |
| 210609_s_at                                        | <i>TP53I3</i>            | 3.9              |
| 211421_s_at                                        | <i>RET</i>               | 3.8              |
| 225912_at                                          | <i>TP53INP1</i>          | 3.8              |
| 205569_at                                          | <i>LAMP3</i>             | 3.7              |
| 232165_at, 232164_s_at, 208156_x_at                | <i>EPPK1</i>             | 3.5              |
| 212942_s_at                                        | <i>KIAA1199</i>          | 3.1              |
| 210090_at                                          | <i>ARC</i>               | 3.0              |
| 201235_s_at, 201236_s_at                           | <i>BTG2</i>              | 2.9              |
| 219583_s_at                                        | <i>PATA7</i>             | 2.8              |
| 226913_s_at                                        | <i>SOX8</i>              | 2.8              |
| 204859_s_at, 211554_s_at                           | <i>APAF1</i>             | 2.8              |
| 215785_s_at, 220999_s_at                           | <i>CYFIP2</i>            | 2.8              |
| 231115_at                                          | <i>GTPBP2</i>            | 2.6              |
| 212070_at                                          | <i>GPR56</i>             | 2.6              |
| 214890_s_at                                        | <i>DKFZP564J102</i>      | 2.6              |
| 213268_at, 1555370_a_at                            | <i>CAMTA1</i>            | 2.5              |
| 242517_at                                          | <i>GPR54</i>             | 2.5              |
| 232289_at                                          | <i>FLJ14167</i>          | 2.5              |
| 204780_s_at, 215719_x_at, 216252_x_at, 204781_s_at | <i>TNFRSF6</i>           | 2.4              |
| 202181_at                                          | <i>KIAA0247</i>          | 2.4              |
| 212907_at, 228181_at                               | <i>SLC30A1</i>           | 2.4              |
| 222546_s_at, 218180_s_at                           | <i>EPS8L2</i>            | 2.4              |
| 227306_at                                          | <i>FLJ21245</i>          | 2.4              |
| 202284_s_at                                        | <i>CDKN1A</i>            | 2.4              |
| 205286_at, 205287_s_at                             | <i>TFAP2C</i>            | 2.3              |
| 206153_at                                          | <i>CYP4F11</i>           | 2.3              |
| 205493_s_at, 205492_s_at                           | <i>DPYSL4</i>            | 2.3              |
| 206832_s_at                                        | <i>SEMA3F</i>            | 2.3              |
| 1557701_s_at                                       | <i>POLH</i>              | 2.2              |
| 201578_at                                          | <i>PODXL</i>             | 2.2              |
| 213469_at                                          | <i>PGAP1</i>             | 2.2              |
| 206277_at                                          | <i>P2RY2</i>             | 2.2              |
| 231928_at                                          | <i>HES2</i>              | 2.2              |
| 204855_at                                          | <i>SERPINB5</i>          | 2.2              |
| 203865_s_at                                        | <i>ADARB1</i>            | 2.2              |
| 203045_at                                          | <i>NINJ1</i>             | 2.1              |
| 235205_at                                          | <i>LOC346887</i>         | 2.1              |
| 224724_at                                          | <i>SULF2</i>             | 2.1              |
| 221577_x_at                                        | <i>GDF15</i>             | 2.1              |
| 210367_s_at                                        | <i>PTGES</i>             | 2.1              |
| 238542_at, 221291_at                               | <i>ULBP2</i>             | 2.0              |
| 228315_at                                          | N/A                      | 2.0              |
| 218346_s_at                                        | <i>SESN1</i>             | 2.0              |
| 204379_s_at, 204380_s_at                           | <i>FGFR3</i>             | 2.0              |
| 230356_at                                          | Transcribed locus        | 2.0              |
| 203722_at                                          | <i>ALDH4A1</i>           | 2.0              |
| 202307_s_at                                        | <i>TAP1</i>              | 1.9              |
| 219099_at                                          | <i>C12orf5</i>           | 1.9              |
| 224793_s_at                                        | <i>TGFBR1</i>            | 1.9              |
| 219936_s_at                                        | <i>GPR87</i>             | 1.9              |
| 212496_s_at, 212492_s_at                           | <i>JMJD2B</i>            | 1.9              |

**Table W2.** (continued)

| Probe Set(s)*                       | Gene Symbol <sup>†</sup> | Induced |
|-------------------------------------|--------------------------|---------|
| 203946_s_at                         | <i>ARG2</i>              | 1.9     |
| 39248_at                            | <i>AQP3</i>              | 1.9     |
| 205278_at                           | <i>GAD1</i>              | 1.8     |
| 207813_s_at                         | <i>FDXR</i>              | 1.8     |
| 203570_at                           | <i>LOXL1</i>             | 1.8     |
| 235230_at                           | <i>PLCXD2</i>            | 1.8     |
| 209050_s_at, 209051_s_at            | <i>RALGDS</i>            | 1.8     |
| 219597_s_at                         | <i>DUOX1</i>             | 1.8     |
| 213568_at                           | <i>OSR2</i>              | 1.8     |
| 218032_at                           | <i>SNN</i>               | 1.8     |
| 227964_at                           | <i>FKSG44</i>            | 1.8     |
| 209712_at, 209711_at                | <i>SLC35D1</i>           | 1.7     |
| 225160_x_at, 229711_s_at            | <i>MGC5370</i>           | 1.7     |
| 238335_at                           | <i>DNAJA5</i>            | 1.7     |
| 235467_s_at                         | <i>KCNC4</i>             | 1.7     |
| 215411_s_at                         | <i>TRAF3IP2</i>          | 1.7     |
| 203310_at                           | <i>STXBP3</i>            | 1.7     |
| 56256_at                            | <i>SIDT2</i>             | 1.7     |
| 228115_at                           | N/A                      | 1.7     |
| 201032_at                           | <i>BLCAP</i>             | 1.7     |
| 208978_at                           | <i>CRIP2</i>             | 1.7     |
| 209693_at                           | <i>ASTN2</i>             | 1.7     |
| 227247_at                           | <i>PLEKHA8</i>           | 1.7     |
| 227295_at                           | <i>IKIP</i>              | 1.7     |
| 209790_s_at                         | <i>CASP6</i>             | 1.7     |
| 213716_s_at                         | <i>SECTM1</i>            | 1.7     |
| 210138_at                           | <i>RGS20</i>             | 1.7     |
| 205483_s_at                         | <i>G1P2</i>              | 1.7     |
| 31846_at, 209885_at                 | <i>RHOD</i>              | 1.6     |
| 201412_at                           | <i>LRP10</i>             | 1.6     |
| 227522_at                           | <i>LOC134147</i>         | 1.6     |
| 219322_s_at, 236381_s_at            | <i>WDR8</i>              | 1.6     |
| 201963_at                           | <i>ACSL1</i>             | 1.6     |
| 235434_at                           | N/A                      | 1.6     |
| 223754_at                           | <i>MGC13057</i>          | 1.6     |
| 1556194_a_at                        | N/A                      | 1.6     |
| 241348_at, 219239_s_at              | <i>ZNF654</i>            | 1.6     |
| 212510_at                           | <i>GPD1L</i>             | 1.6     |
| 336_at                              | <i>TBXA2R</i>            | 1.6     |
| 202627_s_at, 202628_s_at            | <i>SERPINE1</i>          | 1.5     |
| 55081_at, 221779_at                 | <i>MICAL-L1</i>          | 1.5     |
| 212992_at                           | <i>C14orf78</i>          | 1.5     |
| 221215_s_at, 234730_s_at            | <i>RIPK4</i>             | 1.5     |
| 233550_s_at, 223748_at              | <i>SLC4A11</i>           | 1.5     |
| 219358_s_at                         | <i>CENTA2</i>            | 1.5     |
| 1555609_a_at                        | <i>WIG1</i>              | 1.5     |
| 227728_at, 231370_at, 203966_s_at   | <i>PPM1A</i>             | 1.5     |
| 209295_at, 210405_x_at, 209294_x_at | <i>TNFRSF10B</i>         | 1.5     |
| 204061_at                           | <i>PRKX</i>              | 1.5     |
| 232946_s_at                         | <i>NADSYN1</i>           | 1.5     |
| 212800_at, 1552618_at, 212799_at    | <i>STX6</i>              | 1.5     |
| 227420_at                           | <i>MGC17791</i>          | 1.5     |
| 1560228_at                          | <i>SNAI3</i>             | 1.5     |
| 202023_at                           | <i>EFNA1</i>             | 1.4     |
| 201834_at, 201835_s_at              | <i>PRKAB1</i>            | 1.4     |
| 229616_s_at                         | <i>LOC196996</i>         | 1.4     |
| 203068_at                           | <i>KLHL21</i>            | 1.4     |
| 212812_at                           | N/A                      | 1.4     |
| 227221_at                           | N/A                      | 1.4     |
| 225864_at                           | <i>NSE2</i>              | 1.4     |
| 202587_s_at                         | <i>AK1</i>               | 1.4     |
| 226022_at                           | <i>SASH1</i>             | 1.4     |
| 212558_at                           | <i>SPRY1</i>             | 1.4     |
| 201302_at, 201301_s_at              | <i>ANXA4</i>             | 1.4     |
| 208258_s_at, 209729_at, 31874_at    | <i>GAS2L1</i>            | 1.4     |
| 218007_s_at, 238935_at, 222487_s_at | <i>RPS27L</i>            | 1.4     |
| 211833_s_at                         | <i>BAX</i>               | 1.4     |
| 231269_at                           | <i>ASCC3</i>             | 1.4     |
| 220161_s_at                         | <i>EPB41L4B</i>          | 1.4     |
| 222451_s_at                         | <i>ZDHHC9</i>            | 1.4     |
| 226604_at, 226600_at                | <i>SMILE</i>             | 1.4     |
| 242705_x_at                         | <i>LRPAP1</i>            | 1.4     |
| 201117_s_at                         | <i>CPE</i>               | 1.4     |

Table W2. (continued)

| Probe Set(s)*                         | Gene Symbol <sup>†</sup> | Induced |
|---------------------------------------|--------------------------|---------|
| 242463_x_at                           | ZNF600                   | 1.4     |
| 203695_s_at                           | DFNA5                    | 1.4     |
| 205386_s_at                           | MDM2                     | 1.4     |
| 203132_at                             | RB1                      | 1.3     |
| 204060_s_at                           | PRKX, PRKY               | 1.3     |
| 210962_s_at                           | AKAP9                    | 1.3     |
| 219938_s_at                           | PSTPIP2                  | 1.3     |
| 223342_at                             | RRM2B                    | 1.3     |
| 227134_at                             | SYTL1                    | 1.3     |
| 205109_s_at                           | ARHGEF4                  | 1.3     |
| 224690_at                             | C20orf108                | 1.3     |
| 213271_s_at                           | KIAA1117                 | 1.3     |
| 221840_at                             | PTPRE                    | 1.3     |
| 226782_at                             | SLC25A30                 | 1.3     |
| 225049_at                             | BLOC1S2                  | 1.3     |
| 224862_at                             | GNAQ                     | 1.3     |
| 202071_at                             | SDC4                     | 1.3     |
| 224901_at                             | SCD4                     | 1.3     |
| 225734_at                             | FBXO22                   | 1.3     |
| 226805_at                             | C20orf142                | 1.3     |
| 211675_s_at                           | MDFIC                    | 1.3     |
| 220520_s_at                           | FLJ20130                 | 1.3     |
| 204547_at                             | RAB40B                   | 1.3     |
| 202409_at                             | LOC492304                | 1.3     |
| 203224_at, 203225_s_at                | RFK                      | 1.2     |
| 218168_s_at                           | CABC1                    | 1.2     |
| 238480_at                             | C18orf17                 | 1.2     |
| 227204_at                             | PARD6G                   | 1.2     |
| 211272_s_at                           | DGKA                     | 1.2     |
| 226302_at                             | ATP8B1                   | 1.2     |
| 204160_s_at                           | ENPP4                    | 1.2     |
| 224733_at                             | CKLFSF3                  | 1.2     |
| 212099_at                             | RHOB                     | 1.2     |
| 201565_s_at                           | ID2                      | 1.2     |
| 228937_at                             | FLJ38725                 | 1.2     |
| 221012_s_at, 223132_s_at              | TRIM8                    | 1.2     |
| 215646_s_at, 221731_x_at, 211571_s_at | CSPG2                    | 1.2     |
| 218527_at                             | APTX                     | 1.2     |
| 226483_at                             | FLJ32370                 | 1.2     |
| 203115_at                             | FECH                     | 1.2     |
| 202351_at                             | ITGAV                    | 1.2     |
| 209075_s_at                           | NIFUN                    | 1.2     |
| 222874_s_at                           | CLN8                     | 1.2     |
| 222820_at                             | TNRC6C                   | 1.2     |
| 225848_at                             | FLJ31413                 | 1.2     |
| 209513_s_at                           | HSDL2                    | 1.2     |
| 221640_s_at                           | LRDD                     | 1.2     |
| 213038_at, 36564_at                   | IBRDC3                   | 1.2     |
| 224618_at                             | N/A                      | 1.2     |
| 244467_at                             | LOC440829                | 1.2     |
| 226580_at                             | BRMS1L                   | 1.2     |
| 224461_s_at                           | AMID                     | 1.2     |
| 212968_at                             | RFNG                     | 1.2     |
| 202546_at                             | N/A                      | 1.2     |
| 202392_s_at                           | PISD                     | 1.2     |
| 209260_at                             | SFN                      | 1.2     |
| 218373_at                             | FTS                      | 1.2     |
| 218251_at                             | MID1IP1                  | 1.2     |
| 202672_s_at                           | ATF3                     | 1.2     |
| 217297_s_at                           | MYO9B                    | 1.2     |
| 217889_s_at                           | CYBRD1                   | 1.2     |
| 225223_at, 225219_at                  | SMAD5                    | 1.1     |
| 212637_s_at, 212638_s_at              | WWP1                     | 1.1     |
| 218415_at                             | VPS33B                   | 1.1     |
| 227776_at                             | N/A                      | 1.1     |
| 221732_at                             | CANT1                    | 1.1     |
| 226214_at                             | MIR16                    | 1.1     |
| 225473_at                             | FLJ44670                 | 1.1     |

Table W2. (continued)

| Probe Set(s)*                         | Gene Symbol <sup>†</sup> | Induced |
|---------------------------------------|--------------------------|---------|
| 209286_at                             | CDC42EP3                 | 1.1     |
| 210026_s_at                           | CARD10                   | 1.1     |
| 209584_x_at                           | APOBEC3C                 | 1.1     |
| 218627_at                             | FLJ11259                 | 1.1     |
| 204493_at                             | BID                      | 1.1     |
| 216080_s_at                           | FADS3                    | 1.1     |
| 228347_at                             | SIX1                     | 1.1     |
| 44040_at                              | FBXO41                   | 1.1     |
| 235119_at                             | TAF3                     | 1.1     |
| 209558_s_at                           | HIP1R                    | 1.1     |
| 223195_s_at, 223196_s_at              | SESN2                    | 1.1     |
| 212124_at                             | RAI17                    | 1.1     |
| 203216_s_at, 203215_s_at, 210480_s_at | MYO6                     | 1.1     |
| 210260_s_at, 208296_x_at              | TNFAIP8                  | 1.1     |
| 220007_at                             | FLJ13984                 | 1.1     |
| 230563_at                             | RASGEF1A                 | 1.1     |
| 202794_at                             | INPP1                    | 1.1     |
| 200704_at                             | LITAF                    | 1.1     |
| 225334_at                             | C10orf32                 | 1.1     |
| 34206_at                              | CENTD2                   | 1.1     |
| 223474_at                             | C14orf4                  | 1.1     |
| 228098_s_at                           | MYLIP                    | 1.1     |
| 227013_at                             | LATS2                    | 1.1     |
| 221843_s_at                           | KIAA1609                 | 1.1     |
| 214434_at                             | HSPA12A                  | 1.1     |
| 228220_at                             | FCHO2                    | 1.1     |
| 36711_at                              | MAFF                     | 1.1     |
| 213587_s_at                           | C7orf32                  | 1.1     |
| 225604_s_at                           | C9orf19                  | 1.1     |
| 203409_at                             | DDB2, LHX3               | 1.1     |
| 218066_at                             | SLC12A7                  | 1.1     |
| 218764_at                             | PRKCH                    | 1.1     |
| 203499_at                             | EPHA2                    | 1.1     |
| 235252_at                             | KSR                      | 1.1     |
| 201473_at                             | JUNB                     | 1.1     |
| 214435_x_at, 224880_at                | RALA                     | 1.0     |
| 205442_at                             | N/A                      | 1.0     |
| 222687_s_at                           | PHCA                     | 1.0     |
| 224617_at                             | N/A                      | 1.0     |
| 203537_at                             | PRPSAP2                  | 1.0     |
| 203728_at                             | BAK1                     | 1.0     |
| 212983_at                             | HRAS                     | 1.0     |
| 225319_s_at                           | FLJ14775                 | 1.0     |
| 203367_at                             | DUSP14                   | 1.0     |
| 229746_x_at, 231819_at                | CEBPZ                    | 1.0     |
| 225347_at                             | ARL10B                   | 1.0     |
| 218288_s_at                           | MDS025                   | 1.0     |
| 223385_at                             | CYP2S1                   | 1.0     |
| 202755_s_at                           | GPC1                     | 1.0     |
| 212966_at                             | HIC2                     | 1.0     |
| 216041_x_at                           | GRN                      | 1.0     |
| 235688_s_at                           | TRAF4                    | 1.0     |
| 35160_at                              | LDB1                     | 1.0     |
| 201494_at                             | PRCP                     | 1.0     |
| 227357_at                             | TAB3                     | 1.0     |
| 207076_s_at                           | ASS                      | 1.0     |
| 202286_s_at                           | TACSTD2                  | 1.0     |
| 209184_s_at                           | IRS2                     | 1.0     |

\*Probe sets used to identify features on the Affymetrix microarrays. Multiple probe sets are listed if individual genes were represented more than once on the array.

<sup>†</sup>Official gene symbols were determined using the Entrez Gene database (<http://www.ncbi.nlm.nih.gov/sites/entrez>).

<sup>‡</sup>Log<sub>2</sub> (fold increase in expression) resulting from infection with adenoviruses expressing the indicated variant of p53.

<sup>§</sup>The values highlighted in yellow were increased in response to one or more variants of p53 and details are provided in Table W3.

**Table W3.** Genes Induced in Response to Infection with Ad-p53<sup>QS1</sup> and/or Ad-p53<sup>QS2</sup>.

| Gene Symbol               | Variant of p53    |     |     |                  |
|---------------------------|-------------------|-----|-----|------------------|
|                           | WT                | QS1 | QS2 | QS1/QS2          |
| <b>QS1 and QS2</b>        |                   |     |     |                  |
| <i>C1orf187*</i>          | 15.5 <sup>†</sup> | 4.6 | 9.2 | 0.6 <sup>‡</sup> |
| <i>TP53I3<sup>§</sup></i> | 14.4              | 4.0 | 2.5 | 1.1              |
| <i>RET</i>                | 13.9              | 8.6 | 8.3 | 4.9              |
| <i>TP53INP1</i>           | 13.9              | 2.6 | 2.9 | 1.3              |
| <i>EPPK1</i>              | 11.4              | 4.1 | 4.8 | 1.6              |
| <i>BTG2</i>               | 7.5               | 5.1 | 4.1 | 1.9              |
| <i>GPR56</i>              | 6.1               | 3.1 | 2.7 | 1.1              |
| <i>FAS</i>                | 5.3               | 3.4 | 3.2 | 1.9              |
| <i>KIAA0247</i>           | 5.3               | 2.5 | 2.3 | 1.1              |
| <i>EPS8L2</i>             | 5.1               | 3.1 | 2.9 | 1.4              |
| <i>PODXL</i>              | 4.6               | 2.6 | 2.5 | 1.2              |
| <i>PGAP1</i>              | 4.6               | 2.5 | 2.5 | 1.3              |
| <i>SERPINB5</i>           | 4.4               | 2.5 | 2.0 | 1.1              |
| <i>NINJ1</i>              | 4.3               | 2.3 | 2.5 | 1.3              |
| <i>TAP1</i>               | 3.7               | 2.3 | 2.5 | 1.3              |
| <i>C12orf5</i>            | 3.6               | 2.3 | 2.0 | 1.5              |
| <i>DNAJA5</i>             | 3.2               | 3.1 | 3.0 | 2.4              |
| <i>PTPRE</i>              | 2.4               | 2.1 | 2.4 | 1.2              |
| <b>QS1 not QS2</b>        |                   |     |     |                  |
| <i>CAMTA1</i>             | 5.8               | 2.6 | 2.7 | 2.3              |
| <i>FLJ1245</i>            | 5.1               | 3.0 | 2.2 | 1.1              |
| <i>CDKN1A</i>             | 5.1               | 2.1 | 1.7 | 0.6              |
| <i>ULBP2</i>              | 4.1               | 2.0 | 1.6 | 1.3              |
| Transcribed locus         | 3.9               | 2.1 | 2.5 | 1.3              |
| <i>TGFBR1</i>             | 3.6               | 2.0 | 1.8 | 1.5              |
| <i>KCNC4</i>              | 3.2               | 2.7 | 0.9 | 3.5              |
| <i>LRP10</i>              | 3.0               | 2.0 | 1.8 | 1.1              |
| <i>BAX</i>                | 2.5               | 2.3 | 1.8 | 1.1              |
| <i>ASCC3</i>              | 2.5               | 2.1 | 1.5 | 1.5              |
| <b>QS2 not QS1</b>        |                   |     |     |                  |
| <i>LAMP3</i>              | 13.0              | 2.3 | 3.5 | 1.2              |
| <i>SLC30A1</i>            | 5.2               | 2.5 | 2.3 | 1.2              |
| <i>CYP4F11</i>            | 4.9               | 3.6 | 3.5 | 2.5              |
| <i>LOC346887</i>          | 4.3               | 2.0 | 2.1 | 1.1              |
| <i>SLC25A30</i>           | 2.4               | 1.9 | 2.1 | 2.0              |

Genes induced by one or both variants of p53 are grouped together.

\*Official gene symbols were determined using the Entrez Gene database (<http://www.ncbi.nlm.nih.gov/sites/entrez>).

<sup>†</sup>Fold increase in expression following infection with adenoviruses expressing the indicated variant of p53. values are ordered by decreasing fold change in expression following Adp53<sup>wt</sup> infection.

<sup>‡</sup>The values highlighted in yellow were not considered to be induced because they did not meet statistical criteria described in the Materials and Methods.

<sup>§</sup>The fold induction of the gene highlighted in green in response to Adp53<sup>QS1</sup> and Adp53<sup>QS2</sup> infection was reduced more than two-fold compared to the level induced in response to Adp53<sup>wt</sup> infection.

**Table W4.** Correlation between Microarray and RT-PCR Results.

| Transcript       | Variant of p53   |     |     |     |     |     |         |    |
|------------------|------------------|-----|-----|-----|-----|-----|---------|----|
|                  | WT               |     | QS1 |     | QS2 |     | QS1/QS2 |    |
|                  | M*               | RT  | M   | RT  | M   | RT  | M       | RT |
| <i>TP53IP3</i>   | +++ <sup>†</sup> | +++ | +   | +   | +   | +   | -       | -  |
| <i>MAFB</i>      | +++              | +++ | -   | -   | -   | -   | -       | -  |
| <i>APAF1</i>     | ++               | ++  | -   | +   | -   | +   | -       | -  |
| <i>CDKN1A</i>    | ++               | ++  | +   | +/- | -   | +/- | -       | -  |
| <i>SERPINB5</i>  | ++               | ++  | +   | +   | +   | +   | -       | -  |
| <i>MDM2</i>      | +                | +   | -   | -   | -   | -   | -       | -  |
| <i>DDB2</i>      | +                | +   | -   | -   | -   | -   | -       | -  |
| <i>TNFRSF6</i>   | ++               | ++  | ++  | ++  | ++  | ++  | -       | -  |
| <i>BTG2</i>      | +                | +   | +   | +   | +   | +   | -       | -  |
| <i>TNFRSF10B</i> | +                | +   | +/- | +   | +/- | +   | -       | -  |
| <i>BAK1</i>      | +                | +   | -   | +   | -   | +   | -       | -  |
| <i>CASP6</i>     | +                | +   | -   | +/- | -   | +/- | -       | -  |

\*M and RT denote microarray and RT-PCR expression data, respectively.

<sup>†</sup>The number of + symbols indicates the relative increase in transcript level, - indicates that the transcript was not increased by the variant, and +/- indicates that the transcript is marginally increased.
